# Supplementary material for: Application of a BPH zeolite for the transesterification of glycerol to glycerol carbonate: effect of morphology, cation type and reaction conditions
Source: Royal Society of Chemistry journal article supplement (doi:10.1039/d2qi02023h), 2022-11-18
Supplement: d2qi02023h1.pdf [file d2qi02023h1.pdf]

## Supporting Information

### Application of BPH zeolite for the transesterification of glycerol to glycerol carbonate: effect of morphology, cation type and reaction condition

*Siriporn Kosawatthanakun,<sup>a</sup> Edwin B. Clatworthy,<sup>\*b</sup> Sajjad Ghojavand,<sup>b</sup> Narongrit Sosa,<sup>ac</sup> Jatuporn Wittayakun,<sup>\*a</sup> and Svetlana Mintova,<sup>b</sup>*

<sup>a</sup> School of Chemistry, Institute of Science, Suranaree University of Technology, Nakhon Ratchasima 30000, Thailand

<sup>b</sup> Normandie Université, ENSICAEN, UNICAEN, CNRS, Laboratoire Catalyse et Spectrochimie (LCS), 14050 Caen, France

<sup>c</sup> Nuclear Technology Research and Development Center, Thailand Institute of Nuclear Technology (Public Organization), Nakhon Nayok 26120, Thailand

#### Corresponding Authors

\*E-mail: [jatuporn@sut.ac.th](mailto:jatuporn@sut.ac.th)

\*E-mail: [edwin.clatworthy@ensicaen.fr](mailto:edwin.clatworthy@ensicaen.fr)

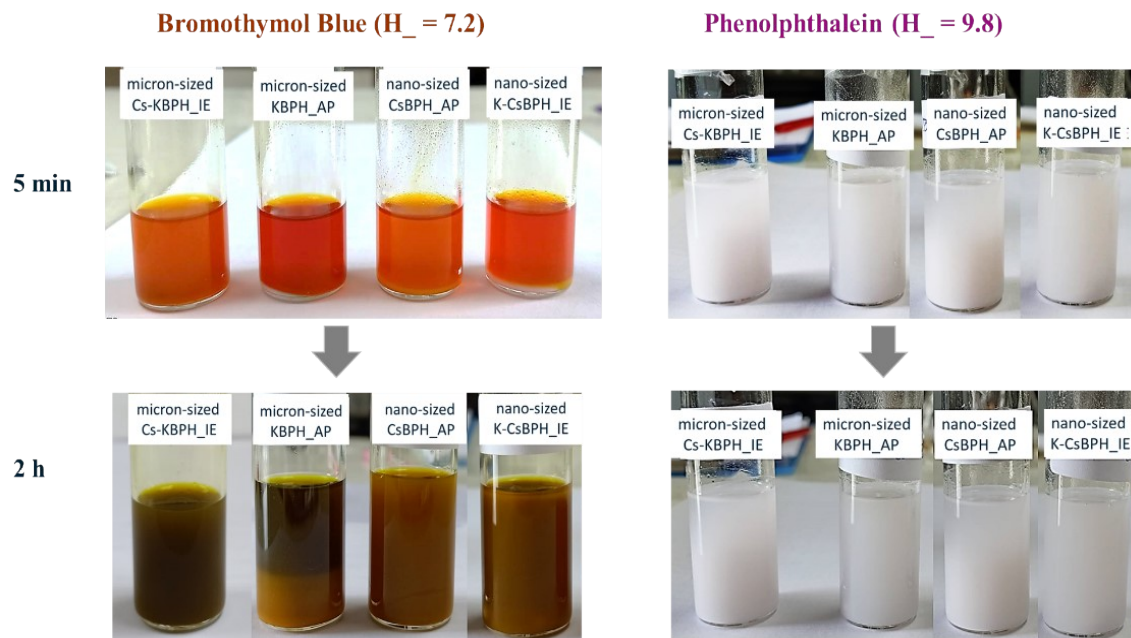

**Fig. S1.** Basicity strength ( $H_{\text{c}}$ ) of catalysts using the Hammett indicator.

**Table S1.** BET surface area and external surface of nano-sized and micron-sized BPH zeolites from  $N_2$  adsorption-desorption analysis.

| Sample name                                | BET surface area ( $m^2 \cdot g^{-1}$ ) | External surface area ( $m^2 \cdot g^{-1}$ ) |
|--------------------------------------------|-----------------------------------------|----------------------------------------------|
| micron-sized KBPH_AP                       | 29                                      | 19                                           |
| micron-sized Cs-KBPH_IE                    | 25                                      | 16                                           |
| nano-sized CsBPH_AP                        | 196                                     | 80                                           |
| nano-sized K-CsBPH_IE*                     | 388                                     | 69                                           |
| reused nano-sized CsBPH_AP_4 <sup>th</sup> | 208                                     | 87                                           |

Degas condition at 300 °C, 8 h, rate 10 °C·min<sup>-1</sup> and micron-sized BPH zeolite were degassed at 120 °C, 24 h using Micromeritics 3Flex physisorption instrument, measurements performed at -196 °C.

\*Degas condition: 350 °C, 8 h, rate 5 °C·min<sup>-1</sup> using a Micromeritics ASAP 2020 volumetric adsorption analyzer, measurements performed at -196 °C.

**Table S2.** Comparison of best catalysts in this work with best catalysts from literature

| Catalyst                              | Reaction condition |            |          |                     | Reaction activity (%) |          |                | Refs.     |
|---------------------------------------|--------------------|------------|----------|---------------------|-----------------------|----------|----------------|-----------|
|                                       | solvent            | Temp. (°C) | Time (h) | Gly:DMC molar ratio | Gly conversion        | GC yield | GC selectivity |           |
| Li/OPAZ (zeolite beta)                | -                  | 70         | 1.5      | 1:2                 | 99                    | 98       | -              | 1         |
| Li/Mg <sub>4</sub> AlO <sub>5.5</sub> | -                  | 80         | 1.5      | 1:3                 | 100                   | 96       | 96             | 2         |
| LDH/SBA-15                            | DMF                | 100        | 2        | 1:3                 | 78                    | 70       | 90             | 3         |
| K/TUD-1                               | -                  | 90         | 2.5      | 1:5                 | 98                    | 92       | 97             | 4         |
| K-CHA                                 | -                  | 75         | 1.5      | 1:3                 | 100                   | 96       | -              | 5         |
| NaY                                   | Methanol           | 70         | 4        | 1:3                 | 80                    | -        | 100            | 6         |
| NaBEA                                 | Methanol           | 70         | 4        | 1:3                 | 37                    | -        | 100            | 6         |
| Nano-sized CsBPH_AP                   | -                  | 120        | 3        | 1:5                 | 83                    | 80       | 96             | This work |

## REFERENCES

1. W. A. Khanday, P. U. Okoye and B. H. Hameed, Biodiesel byproduct glycerol upgrading to glycerol carbonate over lithium–oil palm ash zeolite, *Energy Convers. Manag.*, 2017, **151**, 472-480.
2. Z. Liu, J. Wang, M. Kang, N. Yin, X. Wang, Y. Tan and Y. Zhu, Structure-activity correlations of LiNO<sub>3</sub>/Mg<sub>4</sub> AlO<sub>5.5</sub> catalysts for glycerol carbonate synthesis from glycerol and dimethyl carbonate, *J. Ind. Eng. Chem.*, 2015, **21**, 394-399.
3. Q. M. She, W. J. Huang, A. Talebian-Kiakalaieh, H. Yang and C. H. Zhou, Layered double hydroxide uniformly coated on mesoporous silica with tunable morphologies for catalytic transesterification of glycerol with dimethyl carbonate, *Appl. Clay Sci.*, 2021, **210**.

4. S. Arora, V. Gosu and V. Subbaramaiah, One-pot synthesis of glycerol carbonate from glycerol using three-dimensional mesoporous silicates of K/TUD-1 under environmentally benign conditions, *Mol. Catal.*, 2020, **496**.
5. Y. T. Algoufi and B. H. Hameed, Synthesis of glycerol carbonate by transesterification of glycerol with dimethyl carbonate over K-zeolite derived from coal fly ash, *Fuel Process. Technol.*, 2014, **126**, 5-11.
6. S. Pan, L. Zheng, R. Nie, S. Xia, P. Chen and Z. Hou, Transesterification of glycerol with dimethyl carbonate to glycerol carbonate over Na-based zeolites, *Chinese J. Catal.*, 2012, **33**, 1772-1777.
